# Supplementary material
Source: PubMed Central journal article supplement (PMC3131345)
Supplement: 1017400108_pnas.1017400108_SI.pdf [file 1017400108_pnas.1017400108_SI.pdf]

# Supporting Information

Jégou et al. 10.1073/pnas.1017400108

## SI Text

**CD9 May Induce Small Clusters Causing S Adhesion.** We hypothesize that the same number  $N$  of receptors are present on WT and *Cd9* null egg membranes. On *Cd9* null eggs, the  $N$  receptors are not connected together and they correspond to  $N$  isolated potential binding sites for sperm (Fig. 5A). On WT membranes, CD9 is able to assemble part of these  $N$  receptors into multiprotein patches connecting together  $i$  of these receptors on average. This leads to a reshaping of the membrane organization and to a reduction of the effective number of binding sites since one cluster made of  $i$  receptors is one binding site only.

If  $n$  is the number of clusters formed, the number  $N'$  of binding sites on WT membrane verifies:

$$N' = n + (N - ni) \quad \text{[S1]}$$

where the second term corresponds to the remaining isolated receptors. The interactions coming from the isolated binding sites have no reason to differ from those observed with *Cd9* null eggs. By contrast, adhesions originating from the clusters cannot be found on *Cd9* null eggs since their existence requires the presence of CD9. We have shown in the Results section and Figs. 3 and 4 that all the adhesive interactions except S-type adhesions are shared between WT and *Cd9* null eggs. The S-type adhesion would therefore correspond to sperm interaction with the clusters due to CD9 tetraspanin. The ratio,  $r$ , of receptors involved in the clusters is given by Eq. S2.

$$r = \frac{ni}{N} \quad \text{[S2]}$$

If we assume that the probability  $p$  of adhesion associated to a binding site is the same on WT and *Cd9* null egg, the probability to have no adhesion is  $(1-p)^N$  on *Cd9* null eggs and  $(1-p)^{N'}$  on WT eggs. Because these probabilities were obtained experimentally and equal to 0.25 for *Cd9* null eggs and 0.54 for WT eggs, the ratio  $\frac{N'}{N}$  is equal to 2.25. Eqs. S1 and S2 can be rewritten in order to evaluate  $i$  and  $r$ .

$$i = 1 + \frac{(\frac{N'}{N} - 1)}{\frac{n}{N'}} \quad \text{[S3]}$$

$$r = \frac{n}{N'} \times \frac{N'}{N} + 1 - \frac{N'}{N} \quad \text{[S4]}$$

Making the simple assumption that single attachments are distributed in the same manner as the sites whether they are free receptors or patches,  $\frac{n}{N'}$  corresponds to the fraction of interactions with patches in single attachment events. It can be estimated from the force experimental data. Indeed we have seen that simple attachment events are given by all **B** curves and part of **C** curves (Fig. 2). If one considers that none of the **C** curves correspond to single attachment, then  $\frac{n}{N'}$  is equal to the fraction of interaction with patches (those corresponding to the second peak of the **B** distribution) in **B** curves. The S interactions that correspond to the second peak of the **B** distribution represent 40% of the **B**-shape curves (Histogram  $F_{rupt}$ , Fig. 4). Hence, 0.4 is an upper bound of  $\frac{n}{N'}$ . At the opposite, if one considers that all the **C** curves also correspond to single attachment then  $\frac{n}{N'}$  is equal to the fraction of interaction with patches (those corresponding to the second peak of the **B** distribution) in **B+C** curves. This fraction is

equal to  $0.27 = 20/75$  because S interactions represent 20% of the total number of events, and **B** and **C** curves represent 75% of the total number of events. Hence  $0.27 < \frac{n}{N'} < 0.4$ . Injecting these values in Eqs. S3 and S4, one obtains for  $i$  and  $r$ :  $4.1 < i < 5.6$  and  $0.68 < r < 0.73$ . The result is that around 70% of the  $N$  receptors are involved in clusters composed of five receptors on average. Like CD9, these clusters would be localized on WT egg microvilli and accessible to sperm to generate the S-type adhesion.

**Acrosome Status of the Sperm in BFP Experiments.** In order to check the acrosome status of the sperm in conditions as close as possible to those of the force experiments, we tested live sperm expressing EGFP acrosine prepared with the same protocol as the WT used in the study (incubation of 90 min in medium supplemented with 3% BSA followed by 30 min of incubation in the same medium supplemented with 10  $\mu$ M ionophore). Fig. S1 shows epifluorescent picture of EGFP acrosine sperm, acrosome reacted or not. We have successively grabbed with a micropipette a high number (64) of EGFP acrosine sperm that were extremely mobile, like the ones used in the BFP experiments. Among them, only one was acrosome intact (less than 2%). During the course of an experiment, sperm is micromanipulated and transferred to the oocyte droplet. This process can only increase the yield of acrosomal reaction. The conclusion is that the near totality of the WT sperm used in the force experiments are acrosome reacted just like in physiological context.

**Protocol and Parameters of Force Measurements.** A force distance curve was obtained at each approach-contact-retraction cycle (Fig. S2). By convention, the force was negative when the two cells were in compression and positive when in traction. During the approach phase, the egg was moved at constant speed (10  $\mu$ m/s) into the direction of the sperm. At the beginning of egg displacement, the interaction force was zero. It started to decrease when the two gametes were touching. When the compression force reached 20 pN, the retraction phase begun, pulling the oocyte away from the sperm at 4  $\mu$ m/s. Under these conditions, the total time spent by the gametes under compression was approximately 250 ms. If no intercellular bond was formed, approach and retraction force/distance curves were superimposed while when the gametes did adhere, an interaction force was measured until the link between the two cells broke. In order to have direct information on the egg membrane deformation, we plotted (Fig. 2) the interaction forces as a function of egg extension in the traction axis, defined as the difference of the egg at rest and under traction. The origin of distance was taken when the force reached zero during the pulling phase.

Force experiments were performed on a DMIRB Leica inverted microscope positioned in a heating box (Life Imaging Service, GmbH, Switzerland) to ensure stable temperature of 37°C. Two 20  $\mu$ l drops of M2 medium supplemented with 3% BSA were deposited on a Petri dish and immersed under mineral oil (mouse embryo tested light oil, density 0.84 g/ml, Sigma-Aldrich) as shown in Fig. S3. The experiment required three home made borosilicate glass micropipettes. Pipette 1 was used for RBC/bead/sperm manipulation. Its inner diameter was approximately 2  $\mu$ m. Pipette 2 was positioned perpendicularly to pipette 1, to gently maintain sperm flagellum still during the experiment. Its inner diameter was approximately 3  $\mu$ m. Pipette 3 was positioned in the same axis as pipette 1. Its inner diameter was larger (15  $\mu$ m), it had a smooth rounded extremity in order to gently
